# Supplementary material
Source: PubMed Central journal article supplement (PMC10211352)
Supplement: i1537-2073-25-3-118_s01.pdf [file i1537-2073-25-3-118_s01.pdf]

**Table S1.** Baseline Demographic, Anthropometric, and Clinical Sample Characterization

| Variable                              | All (N = 57)    | NW (n = 29)    | C&T (n = 28)    | <i>P</i> value |
|---------------------------------------|-----------------|----------------|-----------------|----------------|
| Age (SD)                              | 51.98 (9.93)    | 51.10 (8.75)   | 52.89 (11.12)   | .20            |
| Years since diagnosis (SD)            | 14.75 (8.52)    | 15 (12.10)     | 14.5 (14.12)    | .51            |
| BMI (mean as kg/m <sup>2</sup> ) (SD) | 25.94 (5.45)    | 24.22 (26.17)  | 25.83 (18.18)   | .35            |
| Gender, n (%)                         |                 |                |                 | .40            |
| Female                                | 38 (66.7)       | 21 (72.4)      | 17 (60.7)       |                |
| Male                                  | 19 (33.3)       | 8 (27.6)       | 11 (39.3)       |                |
| Phenotype, n (%)                      | 29 (100)        | 29 (100)       | 28 (100)        | .08            |
| RRMS                                  | 37 (64.9)       | 23 (79.3)      | 14 (50)         |                |
| SPMS                                  | 9 (15.8)        | 5 (17.2)       | 4 (14.3)        |                |
| PPMS                                  | 11 (19.3)       | 1 (3.4)        | 10 (35.7)       |                |
| EDSS (median) (range)                 | 4.0 (4.5)       | 4.0 (3.5)      | 4.0 (4.5)       | .51            |
| T25FW test (SD)                       | 6.68 (2.49)     | 6.26 (5.80)    | 6.54 (14.14)    | .32            |
| 6MWT (SD)                             | 372.87 (101.84) | 396.82 (91.84) | 348.08 (107.30) | .07            |
| BBS (SD)                              | 51.57 (5.03)    | 54 (1.3)       | 51.5 (2.2)      | .13            |
| TUG test (SD)                         | 9.58 (3.29)     | 8.88 (9.81)    | 8.99 (18.35)    | .54            |
| ABC scale (SD)                        | 56.60 (20.44)   | 59.20 (20.64)  | 52.07 (20.19)   | .21            |
| MSWS-12 (SD)                          | 37.98 (10.67)   | 36.14 (10.32)  | 40.36 (10.98)   | .16            |
| MFIS (SD)                             | 48.08 (19.12)   | 44.81 (21.35)  | 52.56 (15.17)   | .14            |
| MSQOL-54P (SD)                        | 50.82(17.82)    | 54.15 (19.40)  | 47.44 (15.87)   | .18            |
| MSQOL-54E (SD)                        | 61.11 (21.30)   | 73.69 (80.74)  | 60.38 (70.29)   | .38            |

6MWT, 6-Minute Walk Test; ABC, Activities-specific Balance Confidence; BBS, Berg Balance Scale; C&T, cycling and treadmill; EDSS, Expanded Disability Status Scale; MFIS, Modified

Fatigue Impact Scale; MSQOL-54E, Multiple Sclerosis Quality of Life–54 Emotional; MSQOL-54P, Multiple Sclerosis Quality of Life–54 Physical; MSWS-12, 12-item Multiple Sclerosis Walking Scale; Nordic walking, NW; PPMS, primary progressive multiple sclerosis; RRMS, relapsing-remitting multiple sclerosis; SPMS, secondary progressive multiple sclerosis; T25FW, 25-Foot Walk Test; TUG, Timed Up and Go.

Normal distribution values expressed as mean (SD) and no normal distribution expressed as median (range), or *n* (%).

**Figure S1.** Consolidated Standards of Reporting Trials Diagram.

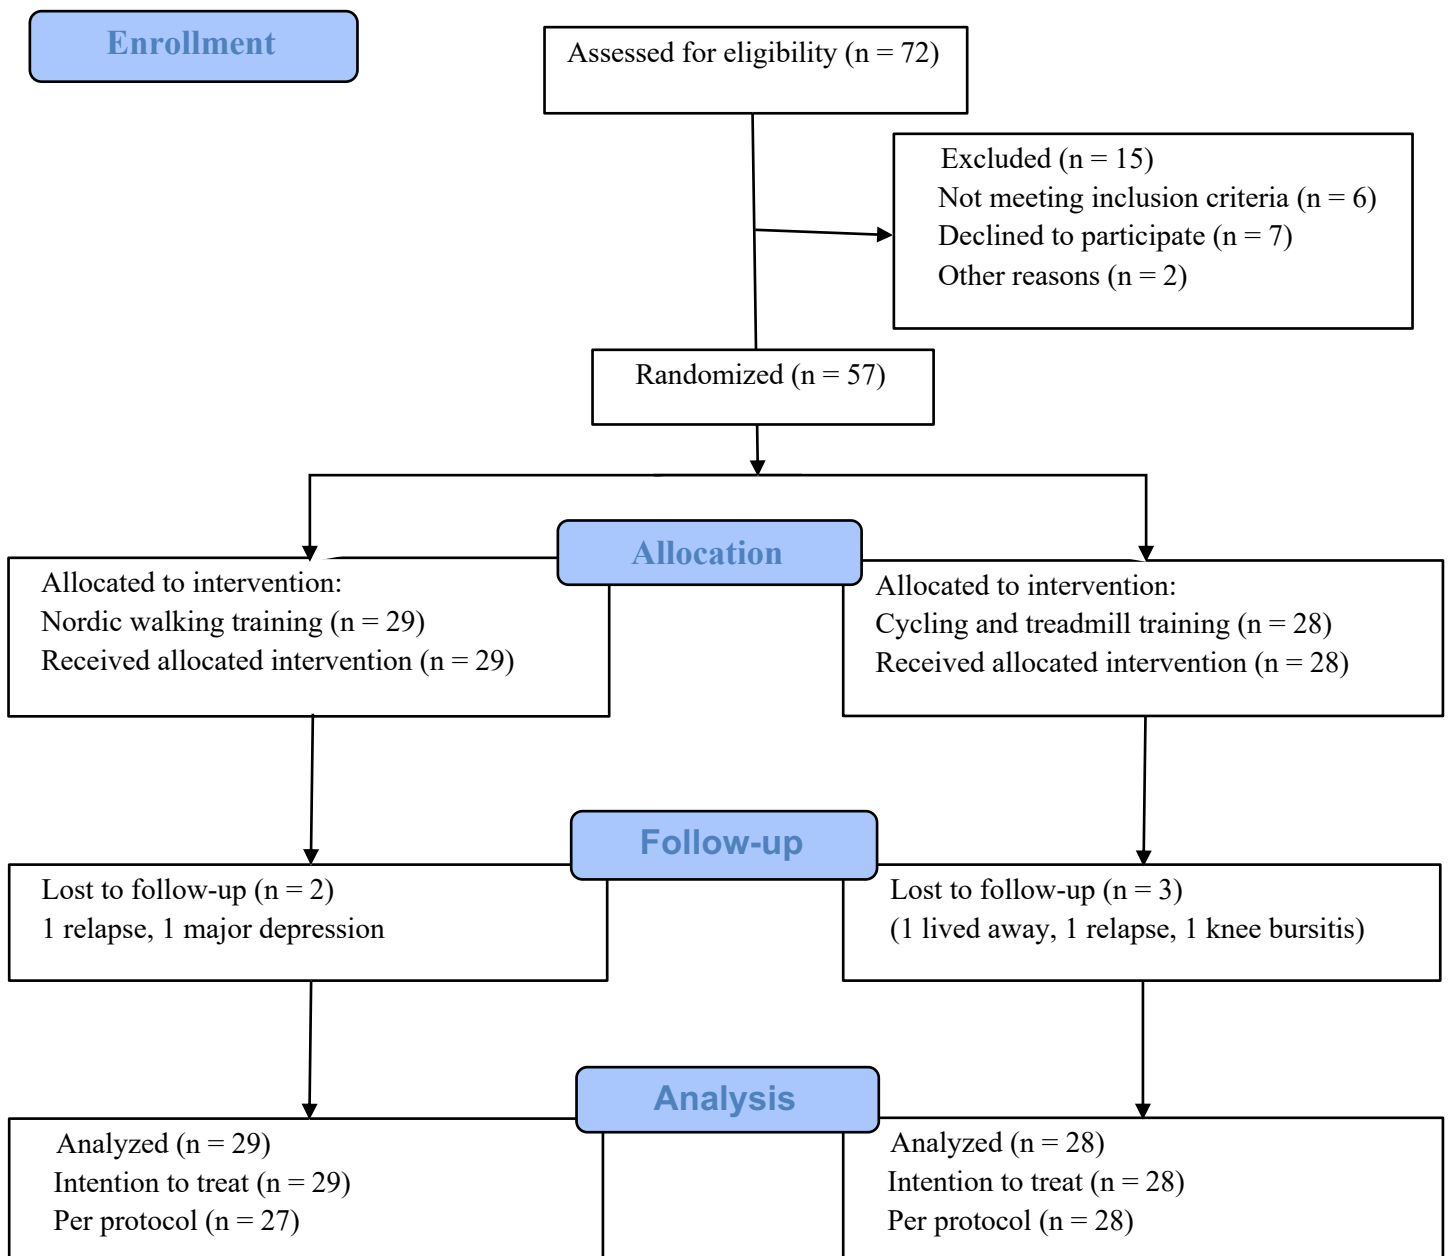

**Figure S2.** Within-Group Pairwise Comparison.

Nordic walking and cycling and treadmill groups on walking capacity measured by the maximal (a) distance on the 6MWT (m) and (b) time (sec) of the T25FWT; and on quality of life measured by the (c) physical and (d) emotional subscales of the MSQOL-54 (%). The asterisks (\*) represent statistical improvement within groups from T1 (pre-training) to T2 (post-training) and T3 (3 months after training).

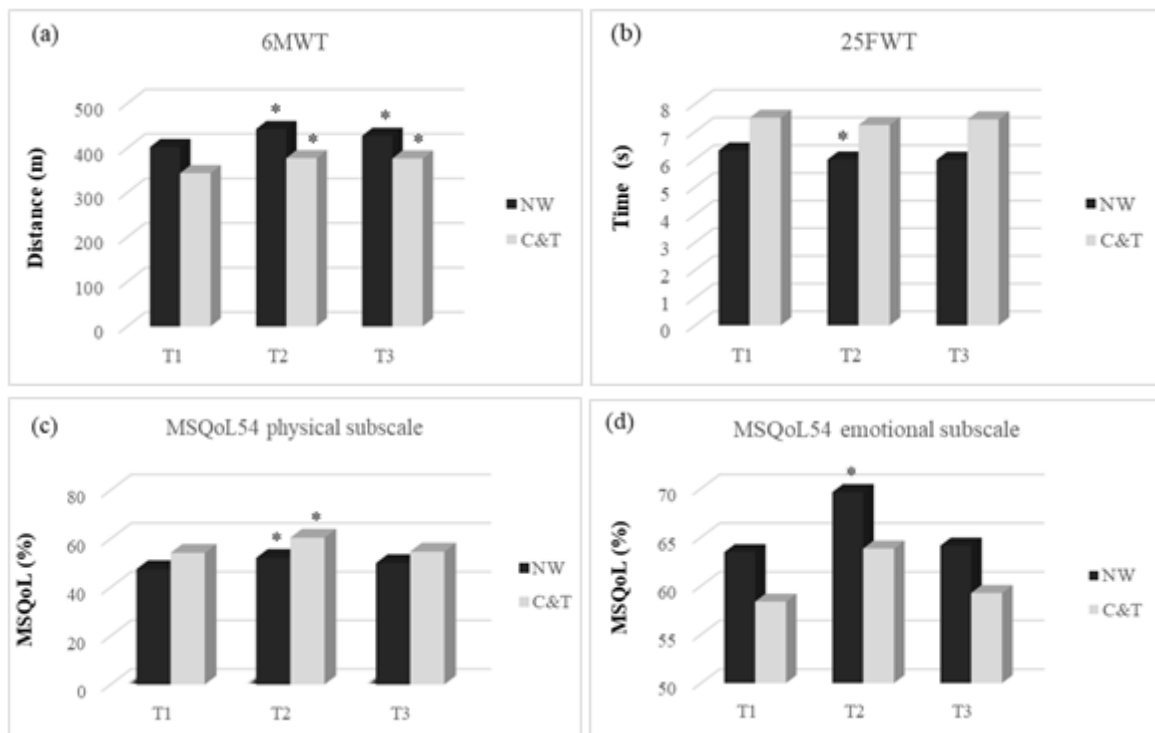

6MWT, Six-Minute Walk Test; cycling and treadmill, C&T; MSQoL-54, Multiple Sclerosis Quality of Life-54; Nordic walking, NW; T25FWT, Timed 25-Foot Walk Test.
